# Supplementary material
Source: PubMed Central journal article supplement (PMC5627764)
Supplement: NIHMS862940-supplement-SI.pdf [file NIHMS862940-supplement-SI.pdf]

## **Supporting Information**

### **Heterogeneous Electrochemical Aptamer-Based Sensor Surfaces for Controlled Sensor Response**

Lauren R. Schoukroun-Barnes, Ethan P. Glaser, and Ryan J. White\*  
Department of Chemistry and Biochemistry, University of Maryland Baltimore County (UMBC)  
1000 Hilltop Circle, Baltimore, MD 21250

## **Table of Contents**

**Figure S1.** Voltammograms showing the specific sensor response to the presence of tobramycin and background signals in the absence of aptamers.

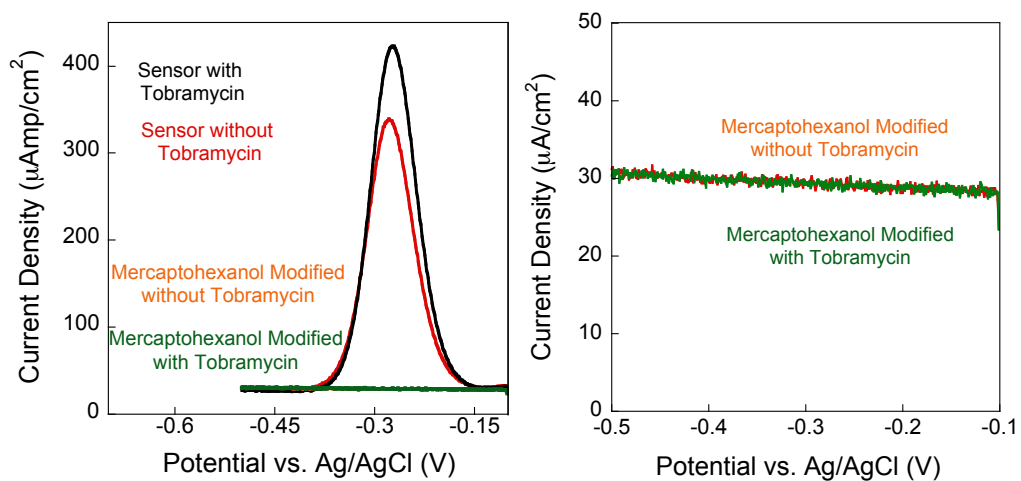

**Figure S1.** Electrochemical, aptamer-based sensors fabricated with parent aptamer respond (left) with an increase in voltammetric peak current resulting from the reversible reduction of methylene blue. (Left and right) As a control, sensors fabricated without aptamers, and thus only the mercaptohexanol backfill monolayer, exhibit no appreciable faradaic current in the absence and presence of tobramycin.
